# Supplementary material for: Evaluation of the prognostic potential of histopathological subtyping in high-grade serous ovarian carcinoma
Source: Springer Nature journal article supplement (doi:10.1007/s00428-024-03807-7), 2024-04-16
Supplement: MOESM1 [file 26984876]

**Online Resource 1:** Clinical characteristics of the cases based on the subtypes

**Online Resource 1A:** Clinical characteristics of the cases based on the subtypes defined by Murakami et al.

|                                        | Mesenchymal | Immunoreactive | Solid and proliferative | Papilloglandular | p-value                 |
|----------------------------------------|-------------|----------------|-------------------------|------------------|-------------------------|
| Cases, n (%)                           | 122 (58.7)  | 10 (4.8)       | 26 (12.5)               | 50 (25)          | N/A                     |
| Age, median (years)                    | 66          | 69.5           | 61.5                    | 69.5             | <i>.024<sup>#</sup></i> |
| FIGO stage, n (%)                      |             |                |                         |                  | <i>.525</i>             |
| I                                      | 2 (1.7)     | 0 (0)          | 1 (3.8)                 | 0 (0)            |                         |
| II                                     | 6 (4.9)     | 1 (10)         | 1 (3.8)                 | 3 (6)            |                         |
| III                                    | 72 (59)     | 4 (40)         | 19 (73.1)               | 31 (62)          |                         |
| IV                                     | 42 (34.4)   | 5 (50)         | 5 (19.3)                | 16 (32)          |                         |
| Type of surgery, n (%)                 |             |                |                         |                  | <i>.121</i>             |
| Staging                                | 4 (3.3)     | 0 (0)          | 1 (3.8)                 | 0 (0)            |                         |
| Primary debulking                      | 26 (21.3)   | 2 (20)         | 12 (46.2)               | 15 (30)          |                         |
| Interval debulking                     | 92 (75.4)   | 8 (80)         | 13 (50)                 | 35 (70)          |                         |
| Debulking surgery outcome*             |             |                |                         |                  | <i>.693</i>             |
| Complete                               | 68 (57.6)   | 9 (90)         | 16 (64)                 | 30 (60)          |                         |
| Optimal                                | 38 (32.2)   | 1 (10)         | 8 (32)                  | 16 (32)          |                         |
| Incomplete                             | 12 (10.2)   | 0 (0)          | 1 (4)                   | 4 (8)            |                         |
| Number of chemotherapy cycles (median) | 6           | 6              | 6                       | 6                | <i>.865</i>             |

Significant p-values are in italic. \*Only patients who underwent primary or interval debulking surgery were analyzed. <sup>#</sup>Post-hoc testing showed differences between the solid and

proliferative and the mesenchymal subtype (adjusted p=.049) and between the solid and proliferative and the papilloglandular subtype (adjusted p=.020). FIGO, International

Federation of Gynecology and Obstetrics; N/A, not applicable.

**Online Resource 1B:** Clinical characteristics of the cases based on the subtypes defined by Miyagawa et al.

|                                        | Mesenchymal | Immunoreactive | Solid and proliferative | Papilloglandular | p-value |
|----------------------------------------|-------------|----------------|-------------------------|------------------|---------|
| Cases, n (%)                           | 122 (58.7)  | 23 (11.1)      | 20 (9.6)                | 43 (20.7)        | N/A     |
| Age, median (years)                    | 66          | 70             | 62                      | 69               | .070    |
| FIGO stage, n (%)                      |             |                |                         |                  | .690    |
| I                                      | 2 (1.7)     | 0 (0)          | 1 (5)                   | 0 (0)            |         |
| II                                     | 6 (4.9)     | 2 (8.7)        | 0 (0)                   | 3 (7)            |         |
| III                                    | 72 (59)     | 13 (56.5)      | 15 (75)                 | 26 (60.4)        |         |
| IV                                     | 42 (34.4)   | 8 (34.8)       | 4 (20)                  | 14 (32.6)        |         |
| Type of surgery, n (%)                 |             |                |                         |                  | .306    |
| Staging                                | 4 (3.3)     | 0 (0)          | 1 (5)                   | 0 (0)            |         |
| Primary debulking                      | 26 (21.3)   | 9 (39.1)       | 6 (30)                  | 14 (32.6)        |         |
| Interval debulking                     | 92 (75.4)   | 14 (60.9)      | 13 (65)                 | 29 (67.4)        |         |
| Debulking surgery outcome*             |             |                |                         |                  | .618    |
| Complete                               | 68 (57.6)   | 18 (78.3)      | 10 (52.6)               | 27 (62.8)        |         |
| Optimal                                | 38 (32.2)   | 4 (17.4)       | 8 (42.1)                | 13 (30.2)        |         |
| Incomplete                             | 12 (10.2)   | 1 (4.3)        | 1 (5.3)                 | 3 (7)            |         |
| Number of chemotherapy cycles (median) | 6           | 6              | 6                       | 6                | .689    |

Significant p-values are in italic. \*Only patients who underwent primary or interval debulking surgery were analyzed. FIGO, International Federation of Gynecology and

Obstetrics; N/A, not applicable.

Article title Evaluation of the prognostic potential of histopathological subtyping in high-grade serous ovarian carcinoma

Journal name Virchows Archiv

Author names Hein S. Zelisse, Robin A. Hwan, Marc J. van de Vijver, Frederike Dijk, Constantijne H. Mom, Gerrit K.J. Hooijer, Mignon D.J.M. van Gent, Malou L.H. Snijders\*

\*Corresponding author Department of Pathology, Cancer Center Amsterdam, Amsterdam UMC, University of Amsterdam, Amsterdam, the Netherlands  
[m.l.h.snijders@amsterdamumc.nl](mailto:m.l.h.snijders@amsterdamumc.nl)
