# Supplementary material for: Evaluation of the prognostic potential of histopathological subtyping in high-grade serous ovarian carcinoma
Source: Springer Nature journal article supplement (doi:10.1007/s00428-024-03807-7), 2024-04-16
Supplement: MOESM2 [file 26984876]

**Online Resource 2:** Univariate and multivariate cox proportional regression analysis

**Online Resource 2A:** Univariate and multivariate cox proportional regression analysis of five-year progression-free survival rate based on subtypes of Murakami et al.

|                                         | Univariate, HR (95% CI) | p-value         | Multivariate, HR (95% CI) | p-value         |
|-----------------------------------------|-------------------------|-----------------|---------------------------|-----------------|
| Age                                     |                         |                 |                           |                 |
| <66                                     | Reference               |                 |                           |                 |
| ≥66                                     | 1.00 (0.75-1.35)        | .985            |                           |                 |
| FIGO stage                              |                         |                 |                           |                 |
| I or II                                 | Reference               |                 | Reference                 |                 |
| III or IV                               | 8.82 (2.81-27.75)       | <i>&lt;.001</i> | 7.27 (2.30-22.99)         | <i>&lt;.001</i> |
| Macroscopic residual tumor post-surgery |                         |                 |                           |                 |
| No                                      | Reference               |                 | Reference                 |                 |
| Yes                                     | 2.39 (1.75-3.25)        | <i>&lt;.001</i> | 2.10 (1.54-2.88)          | <i>&lt;.001</i> |
| Subtype                                 |                         |                 |                           |                 |
| Mesenchymal                             | Reference               |                 | Reference                 |                 |
| Immunoreactive                          | 0.69 (0.34-1.42)        | .316            | 0.92 (0.44-1.91)          | .822            |
| Papilloglandular                        | 1.17 (0.82-1.67)        | .387            | 1.11 (0.78-1.59)          | .557            |
| Solid and proliferative                 | 1.07 (0.67-1.69)        | .779            | 1.10 (0.69-1.75)          | .686            |

Significant p-values are in italic. CI, confidence interval; FIGO, International Federation of Gynecology and Obstetrics.

**Online Resource 2B:** Univariate and multivariate cox proportional regression analysis of five-year progression-free survival rate based on subtypes of Miyagawa et al.

|                                         | Univariate, HR (95% CI) | p-value | Multivariate, HR (95% CI) | p-value |
|-----------------------------------------|-------------------------|---------|---------------------------|---------|
| Age                                     |                         |         |                           |         |
| <66                                     | Reference               |         |                           |         |
| ≥66                                     | 1.00 (0.75-1.35)        | .985    |                           |         |
| FIGO stage                              |                         |         |                           |         |
| I or II                                 | Reference               |         | Reference                 |         |
| III or IV                               | 8.82 (2.81-27.75)       | <.001   | 7.30 (2.31-23.08)         | <.001   |
| Macroscopic residual tumor post-surgery |                         |         |                           |         |
| No                                      | Reference               |         | Reference                 |         |
| Yes                                     | 2.39 (1.75-3.25)        | <.001   | 2.12 (1.55-2.90)          | <.001   |
| Subtype                                 |                         |         |                           |         |
| Mesenchymal                             | Reference               |         | Reference                 |         |
| Immunoreactive                          | 0.87 (0.53-1.42)        | .579    | 1.04 (0.63-1.71)          | .894    |
| Papilloglandular                        | 1.10 (0.75-1.60)        | .636    | 1.05 (0.72-1.53)          | .821    |
| Solid and proliferative                 | 1.26 (0.77-2.09)        | .360    | 1.24 (0.75-2.06)          | .395    |

Significant p-values are in italic. CI, confidence interval; FIGO, International Federation of Gynecology and Obstetrics.

**Online Resource 2C:** Univariate and multivariate cox proportional regression analysis of five-year overall survival rate based on subtypes of Murakami et al.

|                                         | Univariate, HR (95% CI) | p-value | Multivariate, HR (95% CI) | p-value |
|-----------------------------------------|-------------------------|---------|---------------------------|---------|
| Age                                     |                         |         |                           |         |
| <66                                     | Reference               |         |                           |         |
| ≥66                                     | 1.11 (0.79-1.57)        | .549    |                           |         |
| FIGO stage                              |                         |         |                           |         |
| I or II                                 | Reference               |         | Reference                 |         |
| III or IV                               | 3.23 (1.19-8.73)        | .021    | 2.42 (0.89-6.62)          | .084    |
| Macroscopic residual tumor post-surgery |                         |         |                           |         |
| No                                      | Reference               |         | Reference                 |         |
| Yes                                     | 2.63 (1.86-3.72)        | <.001   | 2.45 (1.72-3.50)          | <.001   |
| Subtype                                 |                         |         |                           |         |
| Mesenchymal                             | Reference               |         | Reference                 |         |
| Immunoreactive                          | 0.67 (0.27-1.65)        | .382    | 0.97 (0.38-2.43)          | .941    |
| Papilloglandular                        | 1.37 (0.92-2.03)        | .117    | 1.31 (0.88-1.95)          | .177    |
| Solid and proliferative                 | 0.80 (0.44-1.44)        | .456    | 0.81 (0.45-1.45)          | .473    |

Significant p-values are in italic. CI, confidence interval; FIGO, International Federation of Gynecology and Obstetrics.

**Online Resource 2D:** Univariate and multivariate cox proportional regression analysis of five-year overall survival rate based on subtypes of Miyagawa et al.

|                                         | Univariate, HR (95% CI) | p-value | Multivariate, HR (95% CI) | p-value |
|-----------------------------------------|-------------------------|---------|---------------------------|---------|
| Age                                     |                         |         |                           |         |
| <66                                     | Reference               |         |                           |         |
| ≥66                                     | 1.11 (0.79-1.57)        | .549    |                           |         |
| FIGO stage                              |                         |         |                           |         |
| I or II                                 | Reference               |         | Reference                 |         |
| III or IV                               | 3.23 (1.19-8.73)        | .021    | 2.45 (0.90-6.70)          | .080    |
| Macroscopic residual tumor post-surgery |                         |         |                           |         |
| No                                      | Reference               |         | Reference                 |         |
| Yes                                     | 2.63 (1.86-3.72)        | <.001   | 2.50 (1.75-3.56)          | <.001   |
| Subtype                                 |                         |         |                           |         |
| Mesenchymal                             | Reference               |         | Reference                 |         |
| Immunoreactive                          | 0.85 (0.47-1.52)        | .574    | 1.05 (0.58-1.91)          | .865    |
| Papilloglandular                        | 1.26 (0.83-1.93)        | .282    | 1.25 (0.82-1.90)          | .309    |
| Solid and proliferative                 | 1.03 (0.56-1.90)        | .918    | 0.92 (0.50-1.70)          | .786    |

Significant p-values are in italic. CI, confidence interval; FIGO, International Federation of Gynecology and Obstetrics.

Article title Evaluation of the prognostic potential of histopathological subtyping in high-grade serous ovarian carcinoma

Journal name Virchows Archiv

Author names Hein S. Zelisse, Robin A. Hwan, Marc J. van de Vijver, Frederike Dijk, Constantijne H. Mom, Gerrit K.J. Hooijer, Mignon D.J.M. van Gent, Malou L.H. Snijders\*

\*Corresponding author Department of Pathology, Cancer Center Amsterdam, Amsterdam UMC, University of Amsterdam, Amsterdam, the Netherlands  
[m.l.h.snijders@amsterdamumc.nl](mailto:m.l.h.snijders@amsterdamumc.nl)
